1 ***Wolbachia*-infected pharaoh ant colonies have higher egg production, metabolic**  
2 **rate, and worker survival**

3

4 Rohini Singh<sup>1</sup>, Sachin Suresh<sup>3</sup>, Jennifer H. Fewell<sup>2</sup>, Jon F. Harrison<sup>2</sup>, Timothy A. Linksvayer<sup>1,3\*</sup>

5

6 <sup>1</sup>Department of Biology, University of Pennsylvania, Philadelphia, PA 19104, USA

7 <sup>2</sup>School of Life Sciences, Arizona State University, Tempe, Arizona 85287

8 <sup>3</sup>Department of Biological Sciences, Texas Tech University, Lubbock, TX 79409, USA

9

10 \*corresponding author, email: [tlinksvayer@gmail.com](mailto:tlinksvayer@gmail.com)

11

12 Keywords: Life history, trade-offs, endosymbiont, eusocial insects.

13

14

## 15 **Abstract**

16 *Wolbachia* is a widespread endosymbiotic bacteria with diverse phenotypic effects on its  
17 insect hosts. *Wolbachia* also commonly infects social insects, where it faces unique challenges  
18 associated with its hosts' caste-based reproductive division of labor and colony living. Here we  
19 dissect the benefits and costs of *Wolbachia* infection on life-history traits of pharaoh ants,  
20 *Monomorium pharaonis*. Pharaoh ants are relatively short-lived and show natural variation in  
21 *Wolbachia* infection between colonies, thereby making them an ideal model system for this  
22 study. We quantified effects on the lifespan of queen and worker castes, the egg-laying rate of  
23 queens across queen lifespan, and the metabolic rates of whole colonies and colony members.  
24 Newly-infected queens laid more eggs than uninfected queens but had similar metabolic rates  
25 and lifespans. Surprisingly, infected workers outlived uninfected workers. Infected colonies were  
26 more productive due to increased queen egg-laying rates and worker longevity, and infected  
27 colonies had higher metabolic rates during peak colony productivity. While some effects of  
28 infection, such as elevated colony-level metabolic rates may be detrimental in more stressful  
29 conditions, we did not find any costs of infection under laboratory conditions. Overall, our study  
30 emphasizes the beneficial effects of *Wolbachia* on colony-level growth and metabolism in this  
31 species.

32

## 33 **Background**

34 *Wolbachia*, a widespread maternally-inherited endosymbiotic bacteria, is best known for  
35 its ability to manipulate a wide range of hosts [1,2]. *Wolbachia* is estimated to have infected  
36 more than 65% of all insect species but is also widespread in other invertebrates such as  
37 crustaceans, arachnids, and nematodes [3]. This bacterium often manipulates the host  
38 reproductive systems, thereby causing cytoplasmic incompatibility between infected and

39 uninfected mates, killing or feminizing infected males, causing female-biased sex ratios, or  
40 inducing parthenogenesis[4,5]. *Wolbachia* can also have fitness-enhancing effects for the host,  
41 such as increased host fecundity and survival, conditional on the *Wolbachia* strain, host  
42 genotype, host species, and environment[6–12].

43 Even though *Wolbachia* infects an estimated one-third of all ant species[13], we have a  
44 limited understanding of the phenotypic effects of *Wolbachia* on ants and other social  
45 insects[13,14]. As in solitary insects, *Wolbachia* has often been considered to be a manipulator  
46 of reproductive strategies in multiple species of ants[15–18]. For instance, *Wolbachia*-infected  
47 species are more likely to have dependent colony foundation, where two or more queens start a  
48 nest site together, which is associated with changes in patterns of colony-level resource  
49 investment and queen phenotypes (Treanor and Hughes, 2019). Alternatively, as recently  
50 shown in the ghost ant, *Tapinoma melanocephalum*, *Wolbachia* may also be a nutritional  
51 symbiont ([19] and thus, may have beneficial effects in some ant species. Overall, when  
52 compared to solitary insects, the distinct biology of eusocial insects, specifically their  
53 reproductive division of labor and obligately cooperative lifestyle, may alter the types of  
54 *Wolbachia*-induced effects that occur in queens and workers in social insect colonies  
55 [13,15,16,18,20–25]Treanor & Hughes, 2019; [13,15,16,18,20–25].

56 In the current study, we dissect individual and colony-level benefits and costs of  
57 *Wolbachia* infection in one of the most well-studied invasive ants, *Monomorium pharaonis*. We  
58 previously showed that infected *M. pharaonis* colonies have queen-biased sex ratios [26,27]  
59 and higher colony growth and reproductive potential, with possibly increased reproductive  
60 senescence of infected queens [27]. In the current study, we quantified the effects of *Wolbachia*  
61 infection on the fecundity of queens across their lifespan, the metabolic rates of colonies and  
62 colony members at two different colony life cycle stages (i.e. in colonies with young versus  
63 mature queens), and the lifespan of queens and workers. Overall, we sought to determine if

64 higher colony-level productivity of infected colonies may be explained by higher egg-laying of  
65 infected queens and if that has costs that may be specific to certain castes and colony life cycle  
66 stages.

67

## 68 **Methods**

### 69 Source of infected and uninfected *Monomorium pharaonis* colonies and ant husbandry

70 To initially produce a population of colonies with known *Wolbachia* infection status,  
71 where genetic background and infection status were relatively uncoupled, we systematically  
72 intercrossed colonies that were naturally infected or uninfected with *Wolbachia* for nine  
73 generations [27]. Next, we separately combined 15 of these colonies that were infected, and 14  
74 of these colonies that were uninfected, to create two separate pools of ants that differed in  
75 *Wolbachia* infection but were genetically similar. We used these two pools to create replicate  
76 and genetically homogeneous source colonies of known infection status, which will be referred  
77 to as 'source colonies' from hereon (see Singh & Linksvayer 2020 for more information). We  
78 experimentally synchronized the age of the queens in these source colonies by removing all  
79 existing adult queens from the colonies to initiate production of new virgin queens and males  
80 and restart the colony life cycle. This produced queens of known and the same age across all  
81 the source colonies. These queen age-matched source colonies with known infection status  
82 were then used as sources for known-aged queens and to create replicate experimental  
83 colonies for all the assays performed below. All colonies used in the current study were reared  
84 at  $27 \pm 1$  °C with approximately 50% relative humidity, and fed *ad libitum* synthetic agar diet  
85 (sugar:protein = 3:1; [28]) and dried mealworms (*Tenebrio molitor*) twice a week.

86 *Egg-laying by newly-mated queens*

87 We first compared the numbers of eggs produced by newly-mated infected and  
88 uninfected queens over 50 days in replicate experimental colonies. These replicate  
89 experimental colonies were each created with 50 workers and 20 virgin queens that were mated  
90 with 15 virgin males. The number of eggs, larvae, pupae, and adults was censused in each  
91 colony when the queens were 5, 8, 11, 14, 17, 20, 23, 35, 39, 43, and 50 days old. We used a  
92 blind design for the study where the infection status of the experimental colony at the time of the  
93 census was unknown.

94 *Egg-laying by queens across their lifespan*

95 We next compared egg-laying differences of 20 *Wolbachia*-infected and uninfected  
96 queens when the queens were one, three, four, six, and nine months old to quantify differences  
97 across the queens' lifespan. We assayed total egg production over a 48-hour period by  
98 introducing 20 known-aged queens into replicate eggless experimental colonies. Each  
99 experimental colony was constructed with approximately 500 adult workers and 500 brood  
100 (larvae plus pupae), following a previously described protocol (Singh & Linksvayer 2020). After  
101 48 hours, we censused the total number of eggs in these experimental colonies as a measure of  
102 queen egg-laying rate, and then returned the known-aged queens to their respective source  
103 colonies.

104 *Metabolic rate differences between infected and uninfected colonies and colony members*

105 We compared metabolic rates of (a) infected versus uninfected whole colonies at two  
106 different colony life stages: colonies with one-month-old queens (n =12) and three-month-old  
107 queens (n = 8), representative of colonies with young and mature queens, respectively; and (b)  
108 different colony members, namely the brood and the queens from colonies with one-month-old  
109 queens. We estimated metabolic rates using flow-through respirometry [29] with a LiCor-7000  
110 for whole colonies [30] and brood, and on LiCor-6252 for groups of 15 queens using the

111 differential gas analyzer mode. We used dry CO<sub>2</sub>-free air at a flow rate of 125ml/min (25% of  
112 500 ml/min flow controllers) for whole colonies and brood, and a flow rate of 50 ml/min (100% of  
113 50 ml/min flow controllers) for groups of 15 queens. Additional detail on the respirometry is  
114 provided in the supplemental methods and in Fig. S1. We used source colonies to create  
115 replicate experimental colonies containing queens at the required ages (i.e. one month or three  
116 months old).

117         We quantified metabolic rates of intact whole colonies, just the brood from these  
118 colonies, and just the queens, at an early stage in the colony life cycle (i.e. when queens were  
119 one month old) as this is when growth curves are steepest (Singh and Linksvayer, 2020) and  
120 most likely to be affected by metabolic cost. We estimated the metabolic rates of 12 infected  
121 and 12 uninfected replicate experimental colonies with each colony having 20 one-month-old  
122 queens, approximately 250 workers, and 250 brood. We also estimated the metabolic rates of  
123 just the brood (i.e. eggs plus larvae plus pre-pupae plus pupae) from 11 infected and 11  
124 uninfected colonies, after recording from the intact whole colony (i.e. also containing adult  
125 workers and queens).

126         We measured CO<sub>2</sub> emission from one experimental colony per day and alternated  
127 between infected and uninfected experimental colonies to ensure that the queens were of  
128 similar age between the two groups at the time of measurement. We added a small water tube  
129 in the respirometer chamber along with the colony and the brood, to reduce any stress from  
130 possible dehydration for the brood. Finally, we also estimated metabolic rates of 14 *Wolbachia*-  
131 infected and 15 uninfected groups of 15 queens that were one- to two months old. We  
132 measured one to four groups of queens per day and alternated between infected and uninfected  
133 groups of queens to ensure even sampling across queen ages and colony life cycle stages.

134         We also estimated the metabolic rates of eight *Wolbachia*-infected and eight uninfected  
135 replicate experimental colonies with 20 three-month-old queens and approximately 500 adult

136 workers and 500 brood (eggs to pupae) per colony. We recorded CO<sub>2</sub> emissions from an  
137 infected and an uninfected colony per day. We chose this queen age since *Monomorium*  
138 *pharaonis* colonies peaked in their productivity and *Wolbachia*-infected colonies had increased  
139 reproductive investment than uninfected colonies [27]. Additional details can be found in the  
140 supplementary methods and Fig. S1.

#### 141 Effect of *Wolbachia* infection status on the survival of queens

142 We compared the survival of queens in 18 *Wolbachia*-infected and 16 uninfected small  
143 experimental colonies, each initiated with 20 queens that were each 2.5-months-old, as well as  
144 50 workers. Once every three weeks, and then once a week after four months, we censused  
145 each colony and counted the number of eggs, larvae, pupae, and adults, in particular the  
146 number of surviving queens. At each census, we recorded the number of queens within each  
147 colony that survived (i.e. individual-level survival) and also whether *any* queens within each  
148 colony survived (i.e. group-level survival). We used a blind design for the study so that the  
149 infection status of each colony was unknown while collecting data.

#### 150 Effect of *Wolbachia* infection status on the survival of workers

151 To estimate the effect of *Wolbachia* infection status on worker survival, controlling for  
152 worker genotype (see Fig. S2), we compared the survival of 23 groups of 50 *Wolbachia*-infected  
153 workers and 25 groups of 50 uninfected workers. We set up these replicate worker groups using  
154 newly-eclosed adult workers and censused these worker groups once every three days, from  
155 August 30, 2019 to December 2, 2019. As for queen survival, at each census, we recorded the  
156 number of workers within each replicate group that survived (i.e. individual-level survival) and  
157 also whether *any* workers within each replicate group survived (i.e. group-level survival).

158 Statistical analysis

159 We analyzed the data in R version 3.6.1 [31] with car [32] and lme4 [33] packages for  
160 regression analysis and ggplot2 [34] for visualization. We used survival [35] and survminer [36]  
161 packages to compare survival with log-rank tests and Cox proportional hazards, and visualize  
162 survival probabilities of experimental groups using Kaplan-Meier method.

163 A generalized linear mixed model framework (GLMM; [37] with Poisson error distribution  
164 was used to compare differences in egg-laying over time. For this model, the total number of  
165 eggs at each time point was used as the response variable, *Wolbachia* as a predictor variable,  
166 number of queens and age of the queens as fixed factors, and experimental colony ID as a  
167 random factor to account for repeated measures. To assess differences in egg-laying at specific  
168 time points, a generalized linear model framework (GLM; [37] with negative binomial error  
169 distribution was used with total number of eggs as response variable, *Wolbachia* as a predictor  
170 variable, and number of adult workers and queens as fixed factors.

171 We assessed the allometric relationship between metabolic rates of the whole colonies  
172 (microwatts) and mass of the colonies (grams) using a log-log plot (Fig. S3). Metabolic rates  
173 were estimated, in microwatts and microwatts per gram of the experimental group, from CO<sub>2</sub>  
174 levels measured in ppm by assuming an oxyjoule of 19.87 J ml<sup>-1</sup> O<sub>2</sub> (respiratory quotient of  
175 0.75) and standardized to 25°C assuming a Q<sub>10</sub> = 2.0 [29]. We used a linear model framework  
176 (LM) to test the effects of *Wolbachia* infection, queen age, colony-level activity, colony mass,  
177 and colony size on estimates of metabolic rates. We computed the test statistic of individual  
178 factors in the linear model via ANOVA from the car package [32]. The dataset used in the study,  
179 the detailed R script for data analysis, and the output from the regression models can be found  
180 as supplementary information.

181



## 182 Results

### 183 *Wolbachia-infected pharaoh ant queens lay more eggs early in their life cycle*

184 Newly-mated *Wolbachia*-infected queens produced more eggs over time than uninfected  
185 queens (GLMER:  $\chi^2 = 7.6$ ,  $p = 0.005$ ; Fig 1a). Specifically, *Wolbachia*-infected groups of  
186 queens had more eggs at queen ages of: 8-days-old (GLM:  $\chi^2 = 4.42$ ,  $p = 0.035$ ), 23-days-old  
187 (GLM:  $\chi^2 = 6.82$ ,  $p = 0.009$ ), 35-days-old (GLM:  $\chi^2 = 5.57$ ,  $p = 0.018$ ), and 50-days-old (GLM:  
188  $\chi^2 = 4.81$ ,  $p = 0.028$ ). However, such egg-laying differences were observed only during the early  
189 life stage of the queens (Fig. 1b). Colonies with 1-month-old *Wolbachia*-infected queens  
190 produced more eggs compared to their uninfected counterparts (GLM:  $\chi^2 = 5.88$ ,  $p = 0.015$ ),  
191 while experimental colonies with older queens, did not show significant differences (Fig. 1b).

### 192 *Wolbachia-infected colonies have higher metabolic rates depending on the stage of the colony* 193 *life cycle.*

194 Metabolic rates (microwatts) of whole colonies showed hypometric scaling with mass  
195 (Fig. S3a) and had a scaling coefficient of 0.58 (95% CI, 0.45 - 0.71), which is within the  
196 expected range [38,39]. This means that the mass-specific metabolic rate (microwatts per gram)  
197 will decrease with increasing mass of the ant colony. In contrast, the scaling coefficient of  
198 metabolic rates (microwatts) of only the brood was 1.1 (95% CI, 0.32 - 1.94), which suggested  
199 that as brood mass increases, mass-specific metabolic rates will increase similarly to  
200 expectations by isometric scaling (Fig. S3b). Interestingly for the groups of queens, mass-  
201 specific metabolic rates did not show a significant scaling effect with mass, perhaps due to the  
202 small size variation in groups of 15 queens (Fig. S3c). For the remainder of the discussion,  
203 metabolic rates (microwatts) of colonies and different groups are discussed.

204 *Wolbachia*-infected pharaoh ant colonies with young queens (1- to 2-month-old) had  
205 similar metabolic rates as the uninfected colonies (LM:  $F = 0.57$ ,  $p > 0.05$ ; Fig. 2a). In contrast,

206 *Wolbachia*-infected colonies with older queens (3-month-old) had higher metabolic rates than  
207 uninfected colonies (LM:  $F = 15.6$ ,  $p = 0.002$ ; Fig. 2b).

208 We also compared the metabolic rates of different colony members when the colony was  
209 in early life cycle stages (1- to 2-month-old queens). Metabolic rates of the brood (eggs to  
210 pupae) increased with the age of queens initially present in the colonies (LM:  $F = 9.81$ ,  $p =$   
211  $0.006$ ). Total brood mass also positively influenced brood metabolic rate (LM:  $F = 7.22$ ,  $p =$   
212  $0.016$ ), and total number of brood had a marginal effect (LM:  $F = 3.22$ ,  $p = 0.091$ ). The metabolic  
213 rates of groups of queens increased with the age of the queens (LM:  $F = 16.63$ ,  $p < 0.001$ ) after  
214 statistically accounting for variation in mass of the queens. However, brood from these colonies  
215 did not show differences in metabolic rates when compared to uninfected brood (LM:  $F = 0.34$ ,  $p$   
216  $> 0.05$ ; Fig. S4a). *Wolbachia*-infected groups of 15 queens that were 1- to 2-month-old had  
217 similar metabolic rates as the uninfected queens (LM:  $F = 1.9$ ,  $p = 0.18$ ; Fig. S4b) with no  
218 significant interaction of queen age with *Wolbachia* infection (LM:  $F = 0.98$ ,  $p > 0.05$ ).

#### 219 Caste-specific survival differences due to *Wolbachia*

220 Despite differences in egg-laying of queens and in colony-level metabolic rates at some  
221 queen ages, *Wolbachia*-infected and uninfected queens had similar group- (Log-rank test,  $p =$   
222  $0.8$ ; Fig. 3a) and individual-level survival rates (GLMM,  $\chi^2 = 0.2$ ,  $p < 0.05$ ; Fig. 3b). The  
223 estimated median survival of groups was 230 days for *Wolbachia*-infected queens and 206 days  
224 for uninfected queens (Fig. 3a). Within groups, the proportion of living queens over time was  
225 also similar between infected and uninfected groups (GLMM,  $\chi^2 = 0.2$ ,  $p < 0.05$ ; Fig. 3b).

226 Infected workers had higher group-level survival (Log-rank test,  $p = 0.02$ ; Fig 3c) and  
227 individual-level survival (GLMM,  $\chi^2 = 12$ ,  $p < 0.001$ ; Fig. 3d) than uninfected workers (Fig. 3c,d).  
228 The estimated median survival of groups was 69 days for infected workers and 57 days for  
229 uninfected workers. Groups of 50 *Wolbachia*-infected workers had a higher estimated survival

230 probability than their uninfected counterparts. Within the group, a higher proportion of infected  
231 workers survived over time (GLMM,  $\chi^2 = 12$ ,  $p < 0.001$ ; Fig. 3d).

232

## 233 **Discussion**

234 We compared individual- and colony-level life history traits of infected and uninfected  
235 *Monomorium pharaonis* colonies to elucidate the benefits and costs of *Wolbachia* infection.  
236 Newly-mated *Wolbachia*-infected queens produce more eggs without a metabolic cost.  
237 However, at a later colony life cycle stage (three-month-old queens), when colonies peak in  
238 their productivity and reproductive investment [27], infected colonies have higher metabolic  
239 rates. Despite increased egg-laying by queens and higher colony-level metabolic rates,  
240 *Wolbachia* infection was not associated with decreased queen lifespan. Interestingly, in  
241 workers, which are obligately sterile, *Wolbachia* infection was associated with longer lifespan.  
242 Thus, increased egg-laying rates by queens and longer worker lifespans contribute to the higher  
243 growth rate and productivity that characterizes *Wolbachia*-infected colonies [27].

244 Increased egg production by *Wolbachia*-infected queens may be caused by individual-  
245 level differences in the queens, such as increased stem cell differentiation or oogenesis, as has  
246 been shown in *Drosophila mauritiana* [40] and *Asobara tabida* [41], and/or differences in the  
247 ability of infected workers to rear more eggs. Cross-fostering infected queens with uninfected  
248 workers and *vice-versa* will be useful to tease apart the role of queens, workers, and queen-  
249 worker interaction on *Wolbachia*-induced phenotypes.

250 Given the increased egg-laying by infected queens and increased growth of infected  
251 colonies [27], we expected that infected colonies would have higher metabolic rates.  
252 Furthermore, we expected that this energetic cost would be exacerbated by the maintenance  
253 cost of *Wolbachia* [6, 12, 42]. We did find this pattern in the three-month-old colonies. However,

254 we did not find differences in metabolic rates of infected and uninfected whole colonies, brood,  
255 and queens when the queens were young (one to two months old). This suggests that  
256 *Wolbachia* infection does not have detectable energetic costs, or perhaps *Wolbachia* offsets any  
257 costs through a nutritional symbiosis, as found in the bed bug (*Cimex lectularius*; [43,44], fruit fly  
258 (*Drosophila melanogaster*; [45], and the ghost ant (*Tapinoma melanocephalum*; [19]. Future  
259 studies comparing the metabolic rates of colonies and colony members across multiple colony  
260 life cycle stages will be helpful to better understand the energetic costs of *Wolbachia* infection.

261 A trade-off between fecundity and longevity has widely been observed within and  
262 between species, often assumed to be due to the costs of reproduction [46,47]. In contrast,  
263 social insects show a reversal in this fecundity-longevity tradeoff, where queens have high  
264 fecundity and long lifespans and workers are facultatively or obligately sterile and have short  
265 lifespans [48]. However, while we found an effect of *Wolbachia* infection on queen fecundity, we  
266 found no effect on queen lifespan. Surprisingly, we found that *Wolbachia*-infected workers, which  
267 are obligately sterile, did have longer lifespans. While both positive and negative effects of  
268 *Wolbachia* infection on the lifespan of solitary hosts have been observed [6,12,49], the mechanisms  
269 remain largely unknown. Since workers are obligately sterile in *M. pharaonis* colonies, the  
270 presence of infected fecund queens that live as long as uninfected queens may be beneficial for  
271 *Wolbachia*, as more infected individuals can be produced over time. Future studies teasing apart  
272 the mechanisms by which *Wolbachia* infection causes higher egg-laying rates in *M. pharaonis*  
273 queens with no effect on lifespan and longer lifespans in sterile *M. pharaonis* workers can lead to  
274 general insight into mechanisms linking reproduction, aging, and metabolism.

275

## 276 **Conclusion**

277 We report that *Wolbachia* infection is beneficial for *Monomorium pharaonis* ant colonies,  
278 at least in relatively benign laboratory conditions, as infected young queens produced more

279 eggs, infected colonies had higher metabolic rates during periods of peak productivity, and  
280 infected queens lived as long as the uninfected queens, while infected workers outlived  
281 uninfected workers. These phenotypic effects of infection suggest that *Wolbachia* may have  
282 adapted to exploit the ant reproductive caste system without exacting a detectable cost on its  
283 ant host. The phenotypic and fitness consequences of *Wolbachia* infection that we observed, if  
284 also observed under more natural and in particular more stressful conditions, are expected to be  
285 associated with the rapid spread of *Wolbachia* infection. However, the fact that *Wolbachia*  
286 infection is not universal in *M. pharaonis* colonies (Schmidt 2010) indicates that at least under  
287 some environmental conditions, there are presumably costs of infection that limit the spread of  
288 *Wolbachia* within *M. pharaonis* populations. Future experiments assessing the benefits and  
289 costs of *Wolbachia* under a variety of environmental conditions, especially stressful conditions,  
290 are needed to clarify these issues.

291

## 292 **Data accessibility**

293 Data files and detailed R scripts can be accessed at Dryad  
294 ([https://datadryad.org/stash/share/4PxUOLVYZX-](https://datadryad.org/stash/share/4PxUOLVYZX-AtdvshO9tbqXqlOJMFWBxWkeMrkyR9h8)  
295 [AtdvshO9tbqXqlOJMFWBxWkeMrkyR9h8](https://datadryad.org/stash/share/4PxUOLVYZX-AtdvshO9tbqXqlOJMFWBxWkeMrkyR9h8)).

## 296 **Author's contributions**

297 RS, JHF, JFH and TAL conceived and designed the study. RS collected the data. RS and SS  
298 analysed the data. RS, SS, and TAL drafted the manuscript, and RS, SS, JHF, JFH and TAL  
299 critically revised the manuscript.

## 300 **Competing Interests**

301 We declare we have no competing interests.

302 **Funding**

303 This work was funded by the National Science Foundation (IOS-1452520) awarded to TAL.

304 **Acknowledgments**

305 We are grateful to Dr. Juergen Liebig for letting us safely house the ants at Arizona State  
306 University, Xuaohui Guo in the Fewell lab and Trevor Fox in the Harrison lab at the Arizona  
307 State University for assisting with metabolic rate measurement, and the Linksvayer lab  
308 members for their feedback at various steps of the study.

309 **Figures**

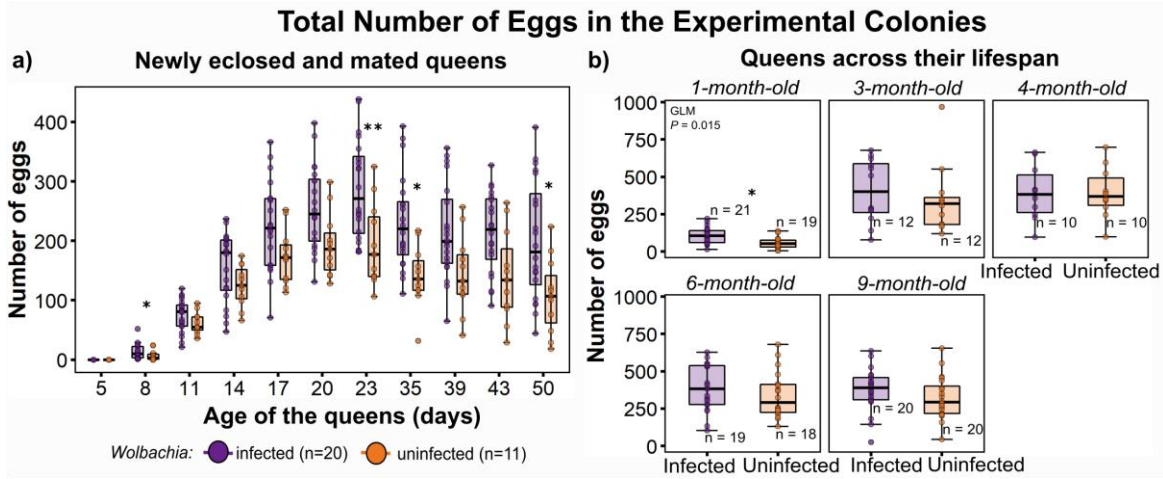

310

311 **Fig 1. *Wolbachia*-infected queens lay more eggs soon after mating.** (a) Groups of 20 newly-

312 mated *Wolbachia*-infected queens lay more eggs than uninfected queens. (b) Colonies with 20

313 one-month-old *Wolbachia*-infected queens laid more eggs after 48 hours of adding the queens

314 to the colonies. However, such differences were not observed when the queens were older. Box

315 plot represents the quartile distribution of the raw data, the filled dots represent the individual

316 raw values. For (a) *Wolbachia* color legend, along with the sample size (n) is included at the

317 bottom of the graph. The x-axis represents the age of the queens in days and the y-axis

318 represents the total counts of eggs in the colonies. For (b) the x-axis represents the *Wolbachia*

319 infection status of the experimental colonies and the y-axis represents the total counts of eggs

320 after 48 hours of adding the queens to the experimental colonies. Sample sizes (n) have been

321 included on individual graphs. Significant differences due to *Wolbachia* infection, as computed

322 from a GLM model, with  $P < 0.05$  is represented by '\*' and with  $P < 0.01$  is represented by '\*\*'

323 on the graphs in (a) and (b).

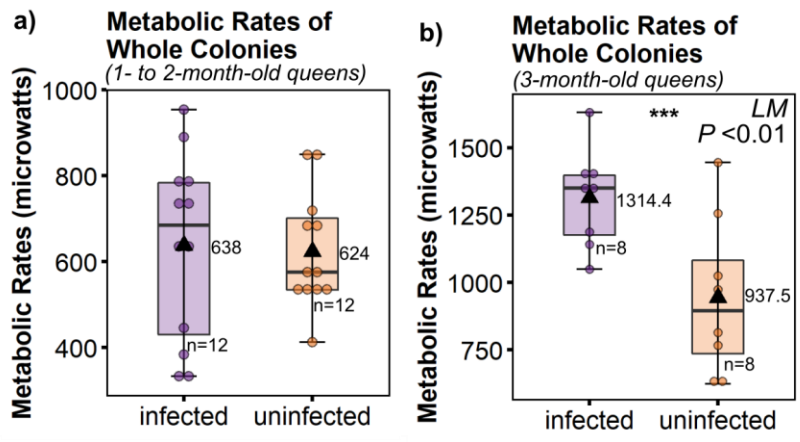

324

325 **Fig 2. Metabolic rates (microwatts) differ between infected and uninfected groups but are**

326 **dependent on colony life cycle stage and colony component. (a) Infected and uninfected**

327 whole colonies with 1- to 2-month-old queens have similar metabolic rates. (b) Infected colonies

328 with 3-month-old-queens have higher metabolic rates than uninfected colonies. X-axis

329 represents the *Wolbachia* infection status of the experimental group. Y-axis represents the

330 metabolic rates of the groups in microwatts. Box plot represents the quartile distribution of the

331 raw data, the filled dots represent the individual raw values. The filled black triangle in the box

332 plot represents the mean, which is also numerically listed besides the box plot. 'n' represents

333 the sample size for the accompanied box plot. '\*\*\*' represents the significant difference between

334 infected and uninfected groups, as determined by a linear model, with  $P < 0.001$ .



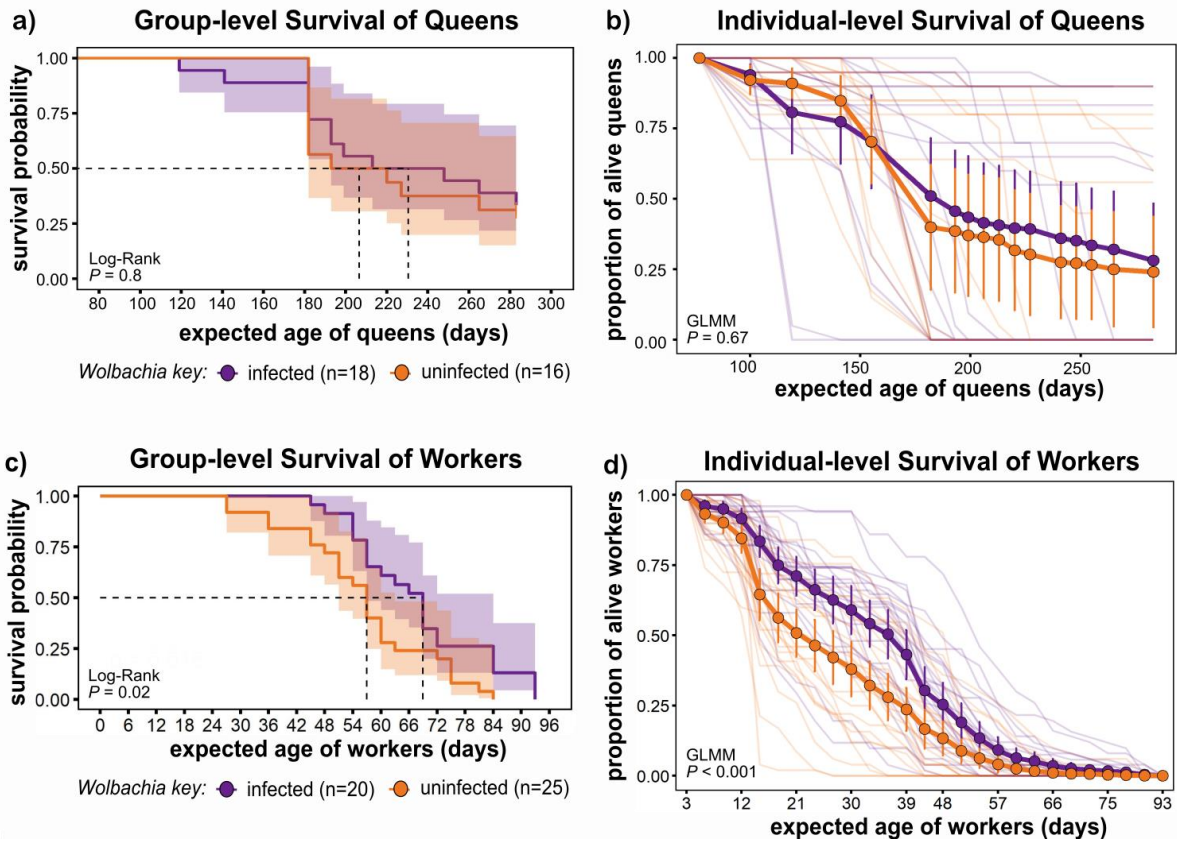

335

336

337 **Figure 3: Survival differences are dependent on *Wolbachia* infection and caste. (a)**

338 Groups of infected and uninfected queens have similar survival probability. (b) Within the groups

339 of queens, infected and uninfected groups have similar proportions of alive queens over time.

340 (c) Infected groups of workers have a higher survival probability than uninfected groups of

341 workers. (d) Within the groups of workers, infected groups have higher proportions of alive

342 workers over time. X-axis represents the estimated age of queens (a, b) or workers (c, d). Y-

343 axis represents the survival probability as estimated by Kaplan-Meier method (a, c) or

344 proportion of alive queens (b) or workers (d). For (a) and (c) solid line represents the mean

345 along with the 95% confidence interval (shaded area). The *P*-value using log-rank test with cox-

346 proportional hazards model is listed on the bottom left corner of the graph. For (b) and (d), filled

347 circles represent the mean value with 95% confidence interval (error bars). Solid dark line

348 represents the mean trend and lighter lines represent the trend of individual groups.  $P$ -value  
349 estimate from GLMM is listed at the bottom left corner.

## 350 References

- 351 1. Russell JA, Goldman-Huertas B, Moreau CS, Baldo L, Stahlhut JK, Werren JH, Pierce NE.  
352 2009 Specialization and geographic isolation among *Wolbachia* symbionts from ants and  
353 lycaenid butterflies. *Evolution* **63**, 624–640. (doi:10.1111/j.1558-5646.2008.00579.x)
- 354 2. Ramalho M de O, Kim Z, Wang S, Moreau CS. 2021 *Wolbachia* Across Social Insects:  
355 Patterns and Implications. *Ann. Entomol. Soc. Am.* **114**, 206–218.  
356 (doi:10.1093/aesa/saaa053)
- 357 3. Werren JH, Baldo L, Clark ME. 2008 *Wolbachia*: master manipulators of invertebrate  
358 biology. *Nat. Rev. Microbiol.* **6**, 741–751. (doi:10.1038/nrmicro1969)
- 359 4. Engelstädter J, Hurst GDD. 2009 The Ecology and Evolution of Microbes that Manipulate  
360 Host Reproduction. *Annu. Rev. Ecol. Evol. Syst.* **40**, 127–149.  
361 (doi:10.1146/annurev.ecolsys.110308.120206)
- 362 5. Zug R, Hammerstein P. 2014 Bad guys turned nice? A critical assessment of *Wolbachia*  
363 mutualisms in arthropod hosts. *Biological Reviews* **90**, 89–111.
- 364 6. Fry AJ, Palmer MR, Rand DM. 2004 Variable fitness effects of *Wolbachia* infection in  
365 *Drosophila melanogaster*. *Heredity* **93**, 379–389. (doi:10.1038/sj.hdy.6800514)
- 366 7. Gruntenko NE, Ilinsky YY, Adonyeva NV, Burdina EV, Bykov RA, Menshanov PN,  
367 Rauschenbach IY. 2017 Various *Wolbachia* genotypes differently influence host *Drosophila*  
368 dopamine metabolism and survival under heat stress conditions. *BMC Evol. Biol.* **17**, 252.  
369 (doi:10.1186/s12862-017-1104-y)
- 370 8. Mouton L, Henri H, Charif D, Boulétreau M, Vavre F. 2007 Interaction between host  
371 genotype and environmental conditions affects bacterial density in *Wolbachia* symbiosis.  
372 *Biol. Lett.* **3**, 210–213. (doi:10.1098/rsbl.2006.0590)
- 373 9. Reynolds KT, Thomson LJ, Hoffmann AA. 2003 The effects of host age, host nuclear  
374 background and temperature on phenotypic effects of the virulent *Wolbachia* strain popcorn  
375 in *Drosophila melanogaster*. *Genetics* **164**, 1027–1034.
- 376 10. Zélé F, Altıntaş M, Santos I, Cakmak I, Magalhães S. 2020 Population-specific effect of  
377 *Wolbachia* on the cost of fungal infection in spider mites. *Ecol. Evol.* **10**, 3868–3880.  
378 (doi:10.1002/ece3.6015)
- 379 11. Gruntenko NE, Karpova EK, Adonyeva NV, Andreenkova OV, Burdina EV, Ilinsky YY,  
380 Bykov RA, Menshanov PN, Rauschenbach IY. 2019 *Drosophila* female fertility and juvenile  
381 hormone metabolism depends on the type of *Wolbachia* infection. *J. Exp. Biol.* **222**.  
382 (doi:10.1242/jeb.195347)
- 383 12. White JA, Kelly SE, Cockburn SN, Perlman SJ, Hunter MS. 2011 Endosymbiont costs and  
384 benefits in a parasitoid infected with both *Wolbachia* and *Cardinium*. *Heredity* **106**, 585–  
385 591. (doi:10.1038/hdy.2010.89)
- 386 13. Russell JA. 2012 The ants (Hymenoptera: Formicidae) are unique and enigmatic hosts of  
387 prevalent *Wolbachia* (Alphaproteobacteria) symbionts. *Myrmecol. News* **16**, 7–23.

- 388 14. Moreau CS. 2020 Symbioses among ants and microbes. *Curr Opin Insect Sci* **39**, 1–5.  
389 (doi:10.1016/j.cois.2020.01.002)
- 390 15. Wenseleers T, Ito F, Van Borm S, Huybrechts R, Volckaert F, Billen J. 1998 Widespread  
391 occurrence of the micro-organism *Wolbachia* in ants. *Proc. Biol. Sci.* **265**, 1447–1452.  
392 (doi:10.1098/rspb.1998.0456)
- 393 16. Shoemaker DD, Ross KG, Keller L, Vargo EL, Werren JH. 2000 *Wolbachia* infections in  
394 native and introduced populations of fire ants (*Solenopsis* spp.). *Insect Mol. Biol.* **9**, 661–  
395 673. (doi:10.1046/j.1365-2583.2000.00233.x)
- 396 17. Van Borm S, Wenseleers T, Billen J, Boomsma JJ. 2001 *Wolbachia* in leafcutter ants: a  
397 widespread symbiont that may induce male killing or incompatible matings. *J. Evol. Biol.* **14**,  
398 805–814.
- 399 18. Wenseleers T, Sundström L, Billen J. 2002 Deleterious *Wolbachia* in the ant *Formica*  
400 *truncorum*. *Proc. Biol. Sci.* **269**, 623–629. (doi:10.1098/rspb.2001.1927)
- 401 19. Cheng D *et al.* 2019 Symbiotic microbiota may reflect host adaptation by resident to  
402 invasive ant species. *PLoS Pathog.* **15**, e1007942. (doi:10.1371/journal.ppat.1007942)
- 403 20. de Bekker C, Will I, Das B, Adams RMM. 2018 The ants (Hymenoptera: Formicidae) and  
404 their parasites: effects of parasitic manipulations and host responses on ant behavioral  
405 ecology. *Myrmecol. News* **28**.
- 406 21. Tsutsui ND, Kauppinen SN, Oyafuso AF, Grosberg RK. 2003 The distribution and  
407 evolutionary history of *Wolbachia* infection in native and introduced populations of the  
408 invasive Argentine ant (*Linepithema humile*): Phylogeography of *Wolbachia* in Argentine  
409 ants. *Mol. Ecol.* **12**, 3057–3068. (doi:10.1046/j.1365-294X.2003.01979.x)
- 410 22. Reuter M, Pedersen JS, Keller L. 2005 Loss of *Wolbachia* infection during colonisation in  
411 the invasive Argentine ant, *Linepithema humile*. *Heredity* **94**, 364–369.  
412 (doi:10.1038/sj.hdy.6800601)
- 413 23. Rey O, Estoup A, Facon B, Loiseau A, Aebi A, Duron O, Vavre F, Foucaud J. 2013  
414 Distribution of endosymbiotic reproductive manipulators reflects invasion process and not  
415 reproductive system polymorphism in the little fire ant *Wasmannia auropunctata*. *PLoS One*  
416 **8**, e58467. (doi:10.1371/journal.pone.0058467)
- 417 24. Bouwma AM, Ahrens ME, DeHeer CJ, DeWayne Shoemaker D. 2006 Distribution and  
418 prevalence of *Wolbachia* in introduced populations of the fire ant *Solenopsis invicta*. *Insect*  
419 *Mol. Biol.* **15**, 89–93. (doi:10.1111/j.1365-2583.2006.00614.x)
- 420 25. Kautz S, Rubin BER, Moreau CS. 2013 Bacterial Infections across the Ants: Frequency and  
421 Prevalence of *Wolbachia*, *Spiroplasma*, and *Asaia*. *Psyche* **2013**.  
422 (doi:10.1155/2013/936341)
- 423 26. Pontieri L, Schmidt AM, Singh R, Pedersen JS, Linksvayer TA. 2017 Artificial selection on  
424 ant female caste ratio uncovers a link between female-biased sex ratios and infection by  
425 *Wolbachia* endosymbionts. *J. Evol. Biol.* **30**, 225–234. (doi:10.1111/jeb.13012)
- 426 27. Singh R, Linksvayer TA. 2020 *Wolbachia*-infected ant colonies have increased reproductive

- 427 investment and an accelerated life cycle. *J. Exp. Biol.* **223**. (doi:10.1242/jeb.220079)
- 428 28. Dussutour A, Simpson SJ. 2008 Description of a simple synthetic diet for studying  
429 nutritional responses in ants. *Insectes Soc.* **55**, 329–333. (doi:10.1007/s00040-008-1008-3)
- 430 29. Lighton JRB. 2018 *Measuring Metabolic Rates: A Manual for Scientists*. Oxford University  
431 Press. See <https://play.google.com/store/books/details?id=OMt-DwAAQBAJ>.
- 432 30. Waters JS, Holbrook CT, Fewell JH, Harrison JF. 2010 Allometric scaling of metabolism,  
433 growth, and activity in whole colonies of the seed-harvester ant *Pogonomyrmex*  
434 *californicus*. *Am. Nat.* **176**, 501–510. (doi:10.1086/656266)
- 435 31. R Core Team. 2019 *R: A language and environment for statistical computing*.
- 436 32. Fox J, Weisberg S. 2019 *An R Companion to Applied Regression*. Third. Thousand Oaks  
437 CA: Sage. See <https://socialsciences.mcmaster.ca/jfox/Books/Companion/>.
- 438 33. Bates D, Mächler M, Bolker B, Walker S. 2015 Fitting Linear Mixed-Effects Models Using  
439 lme4. *J. Stat. Softw.* **67**, 1–48. (doi:10.18637/jss.v067.i01)
- 440 34. Wickham H, Francois R, Henry L, Müller K, Others. 2015 dplyr: A grammar of data  
441 manipulation. *R package version 0. 4 3*.
- 442 35. Therneau TM, Grambsch PM. 2000 *Modeling Survival Data: Extending the Cox Model*.  
443 Springer Science & Business Media. See  
444 <https://play.google.com/store/books/details?id=9kY4XRuUMUsC>.
- 445 36. Kassambara A, Kosinski M, Biecek P. 2019 survminer: Drawing Survival Curves using  
446 'ggplot2'.
- 447 37. Bolker BM, Brooks ME, Clark CJ, Geange SW, Poulsen JR, Stevens MHH, White J-SS.  
448 2009 Generalized linear mixed models: a practical guide for ecology and evolution. *Trends*  
449 *Ecol. Evol.* **24**, 127–135. (doi:10.1016/j.tree.2008.10.008)
- 450 38. Shik JZ, Hou C, Kay A, Kaspari M, Gillooly JF. 2012 Towards a general life-history model of  
451 the superorganism: predicting the survival, growth and reproduction of ant societies. *Biol.*  
452 *Lett.* **8**, 1059–1062. (doi:10.1098/rsbl.2012.0463)
- 453 39. Fewell JH, Harrison JF. 2016 Scaling of work and energy use in social insect colonies.  
454 *Behav. Ecol. Sociobiol.* **70**, 1047–1061. (doi:10.1007/s00265-016-2097-z)
- 455 40. Fast EM, Toomey ME, Panaram K, Desjardins D, Kolaczyk ED, Frydman HM. 2011  
456 *Wolbachia* enhance *Drosophila* stem cell proliferation and target the germline stem cell  
457 niche. *Science* **334**, 990–992. (doi:10.1126/science.1209609)
- 458 41. Dedeine F, Vavre F, Fleury F, Loppin B, Hochberg ME, Bouletreau M. 2001 Removing  
459 symbiotic *Wolbachia* bacteria specifically inhibits oogenesis in a parasitic wasp. *Proc. Natl.*  
460 *Acad. Sci. U. S. A.* **98**, 6247–6252. (doi:10.1073/pnas.101304298)
- 461 42. Fleury F, Vavre F, Ris N, Fouillet P, Boulétreau M. 2000 Physiological cost induced by the  
462 maternally-transmitted endosymbiont *Wolbachia* in the *Drosophila* parasitoid, *Leptopilina*  
463 *heterotoma*. *Parasitology* **121**, 493–500. (doi:10.1017/S0031182099006599)

- 464 43. Nikoh N, Hosokawa T, Moriyama M, Oshima K, Hattori M, Fukatsu T. 2014 Evolutionary  
465 origin of insect-*Wolbachia* nutritional mutualism. *Proc. Natl. Acad. Sci. U. S. A.* **111**, 10257–  
466 10262. (doi:10.1073/pnas.1409284111)
- 467 44. Hosokawa T, Koga R, Kikuchi Y, Meng X-Y, Fukatsu T. 2010 *Wolbachia* as a bacteriocyte-  
468 associated nutritional mutualist. *Proc. Natl. Acad. Sci. U. S. A.* **107**, 769–774.  
469 (doi:10.1073/pnas.0911476107)
- 470 45. Brownlie JC, Cass BN, Riegler M, Witsenburg JJ, Iturbe-Ormaetxe I, McGraw EA, O'Neill  
471 SL. 2009 Evidence for metabolic provisioning by a common invertebrate endosymbiont,  
472 *Wolbachia pipientis*, during periods of nutritional stress. *PLoS Pathog.* **5**, e1000368.  
473 (doi:10.1371/journal.ppat.1000368)
- 474 46. Hammers M, Richardson DS, Burke T, Komdeur J. 2013 The impact of reproductive  
475 investment and early-life environmental conditions on senescence: support for the  
476 disposable soma hypothesis. *J. Evol. Biol.* **26**, 1999–2007. (doi:10.1111/jeb.12204)
- 477 47. Kirkwood TB, Holliday R. 1979 The evolution of ageing and longevity. *Proc. R. Soc. Lond.*  
478 *B Biol. Sci.* **205**, 531–546. (doi:10.1098/rspb.1979.0083)
- 479 48. Korb J, Heinze J. 2021 Ageing and sociality: why, when and how does sociality change  
480 ageing patterns? *Philos. Trans. R. Soc. Lond. B Biol. Sci.* **376**, 20190727.  
481 (doi:10.1098/rstb.2019.0727)
- 482 49. Min KT, Benzer S. 1997 *Wolbachia*, normally a symbiont of *Drosophila*, can be virulent,  
483 causing degeneration and early death. *Proc. Natl. Acad. Sci. U. S. A.* **94**, 10792–10796.  
484 (doi:10.1073/pnas.94.20.10792)
- 485 50. Birgiolas J, Jernigan CM, Smith BH, Crook SM. 2017 SwarmSight: Measuring the temporal  
486 progression of animal group activity levels from natural-scene and laboratory videos.  
487 *Behav. Res. Methods* **49**, 576–587. (doi:10.3758/s13428-016-0732-2)

488

489

490

491

492

493
